# Supplementary material
Source: PubMed Central journal article supplement (PMC3442230)
Supplement: NIHMS48683-supplement-1.pdf [file NIHMS48683-supplement-1.pdf]

## Supplementary Figures

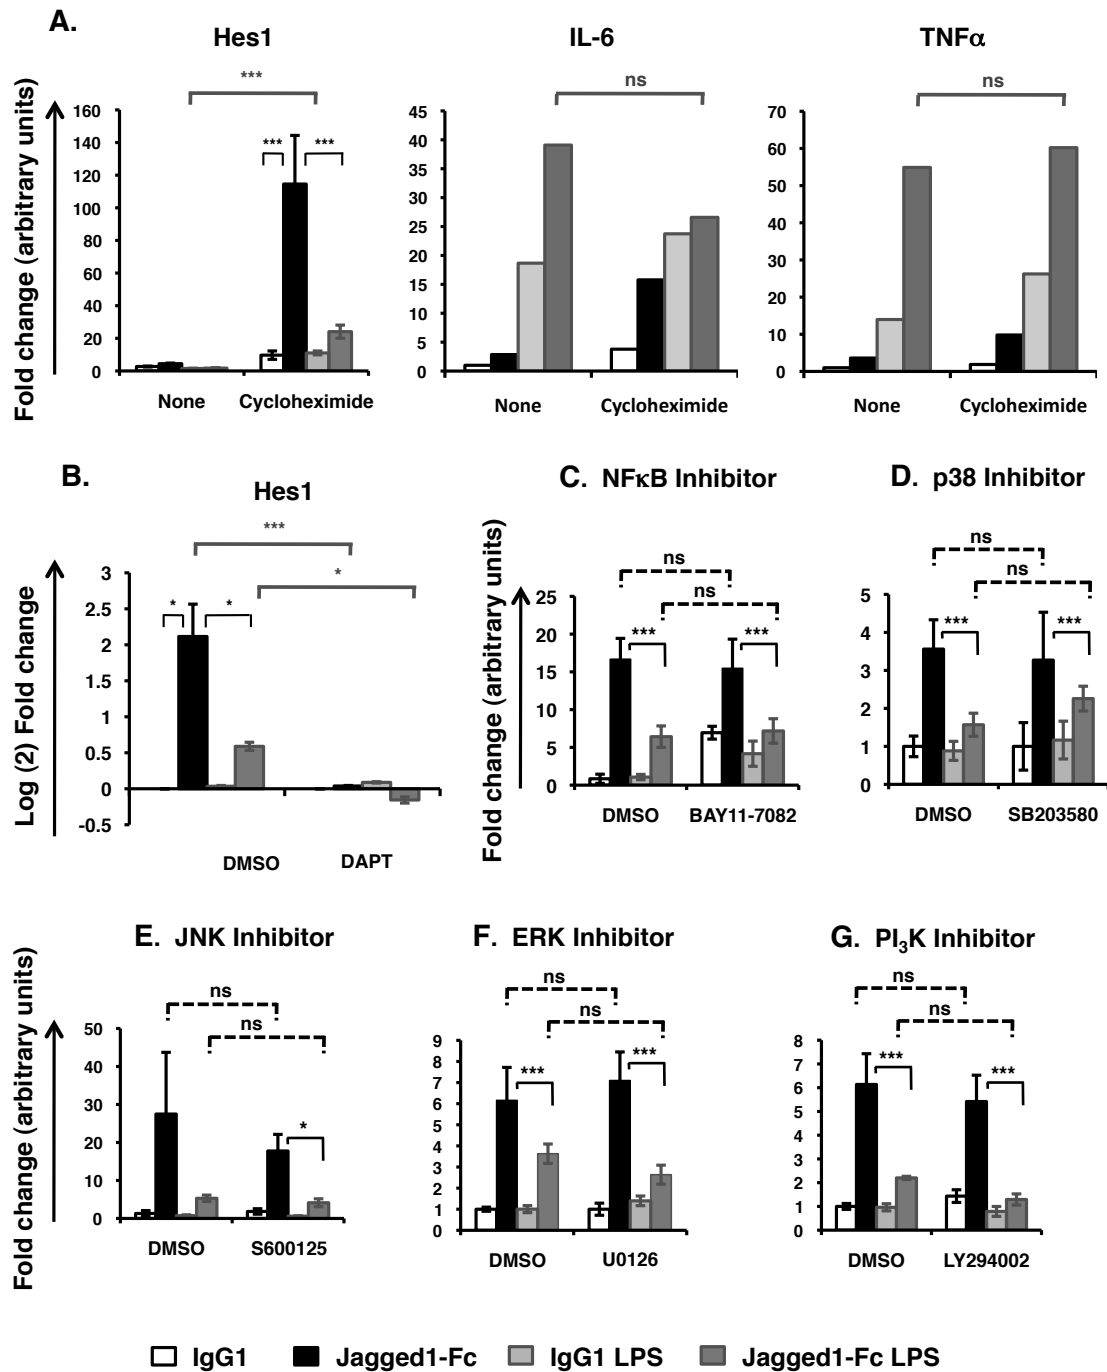

**Supplementary Figure S1 Hes1 is directly induced by  $\gamma$ -secretase dependent Notch signaling and suppression of Jagged1-Fc induced Hes1 by LPS is not significantly altered by inhibition of NF $\kappa$ B, MAPK, or PI<sub>3</sub>K activity. BMDC were pretreated with (A) 10  $\mu$ g/ml cycloheximide, (B) 10  $\mu$ M of DAPT, (C) BAY11-**

7082, (D) SB203580, (E) SP600125, (F) U0126, (G) LY294002 or a corresponding quantity of vehicle control (DMSO) for 1 hour and then stimulated with Jagged1-Fc or IgG1 in the presence or absence of 100 ng/ml LPS for 4 h. Relative levels of Hes1, IL-6 or TNF $\alpha$  mRNA transcripts were measured after 4 h by qrt-PCR. Data in all parts are mean  $\pm$  SD of triplicates and are representative of at least 3 independent experiments. Two-way ANOVA with Bonferroni post-test was used to statistically compare stimuli; P<0.05 was considered significant. \* = P<0.05, \*\* = P<0.01, \*\*\* = P<0.001, ns = not significant.

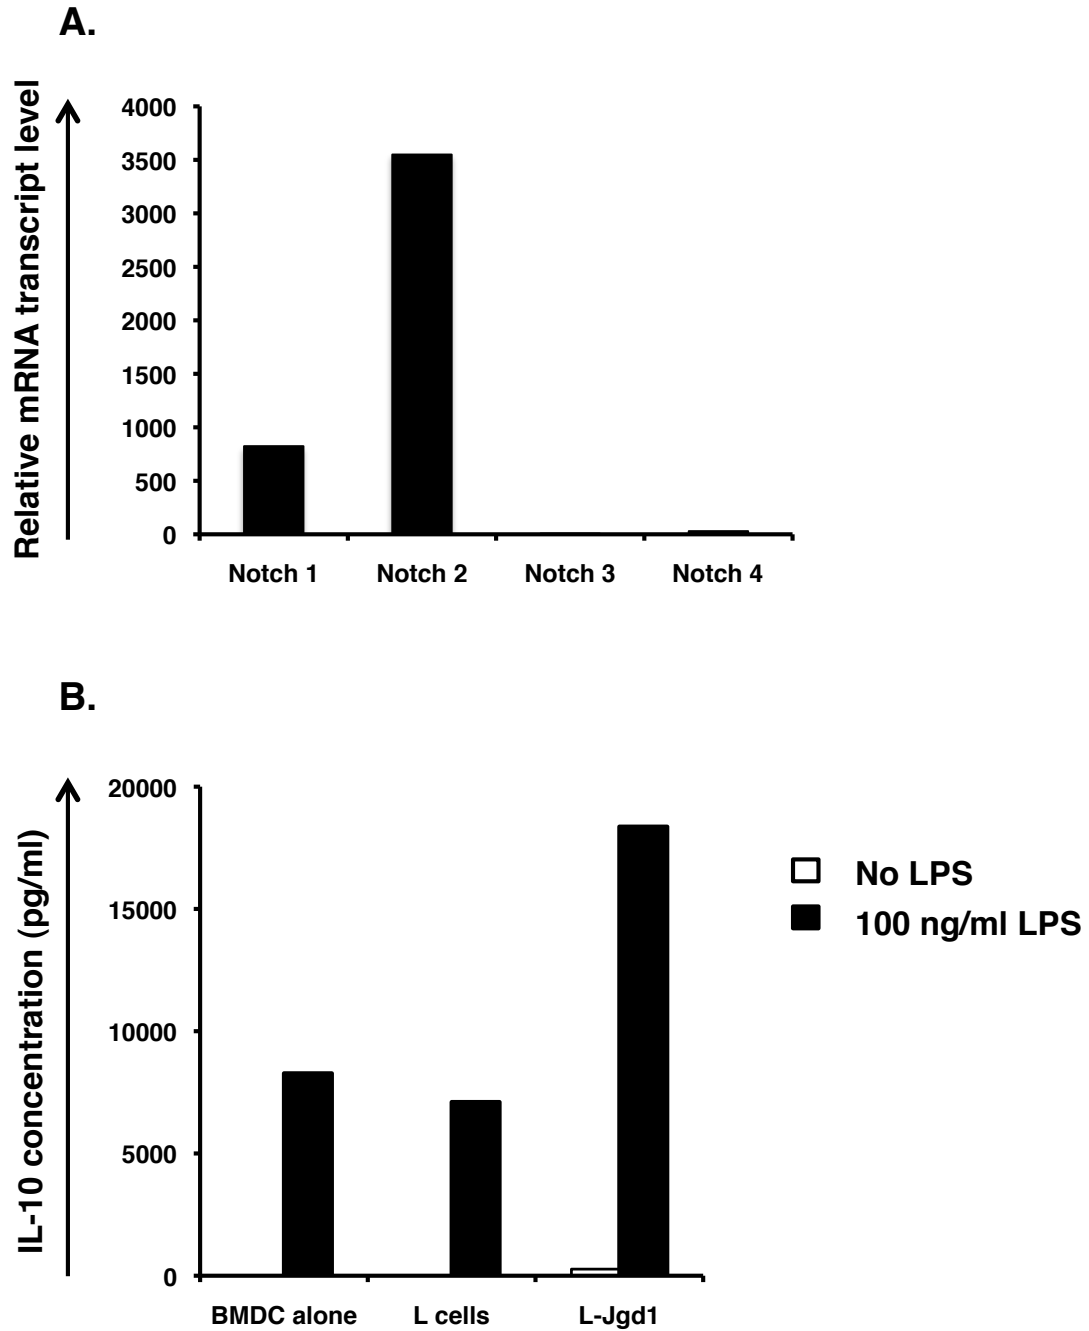

**Supplementary Figure S2 BMDC express Notch1 and Notch2 mRNA and Notch ligation of DC augments LPS induced IL-10.** (A) Relative steady state expression levels of Notch receptor mRNA transcripts present in BMDC. (B) BMDC were co-cultured with the parental L cell line or L cells expressing Delta-like1 (L- $\Delta$ L1) or Jagged1 (L-Jgd1) at a ratio of 1:1 in the presence or absence of 100 ng/ml LPS. IL-10

present in the supernatant after culture for 24 h was measured by ELISA and data shown are representative of 3 independent experiments.

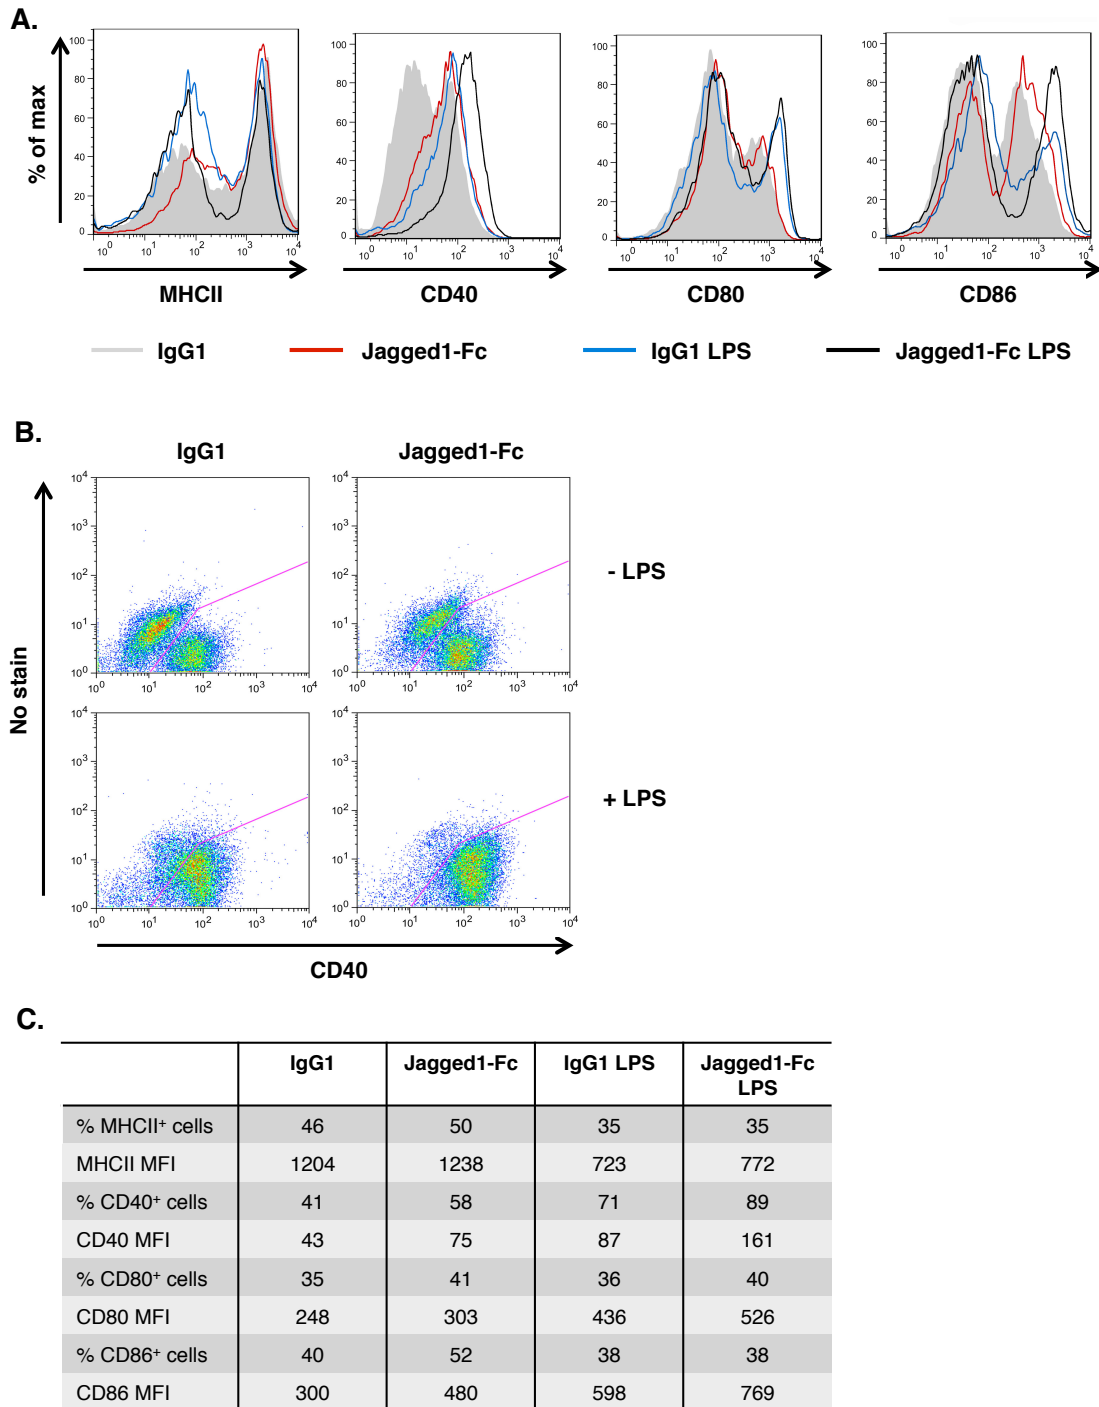

**Supplementary Figure S3 Jagged1-Fc enhances surface CD40 expression.**

BMDC were stimulated with plate bound IgG1 or Jagged1-Fc in the presence or absence of 100 ng/ml LPS for 24 h. Surface CD40, CD80, CD86 and MHC Class II

expression was measured by flow cytometry. Histograms are shown in **A**, representative dot-plots for CD40 expression are shown in **B**, while the percentage of CD40<sup>+</sup>, CD80<sup>+</sup>, CD86<sup>+</sup>, and MHC class II<sup>+</sup> cells are given in **B**. Data are representative of two independent experiments.

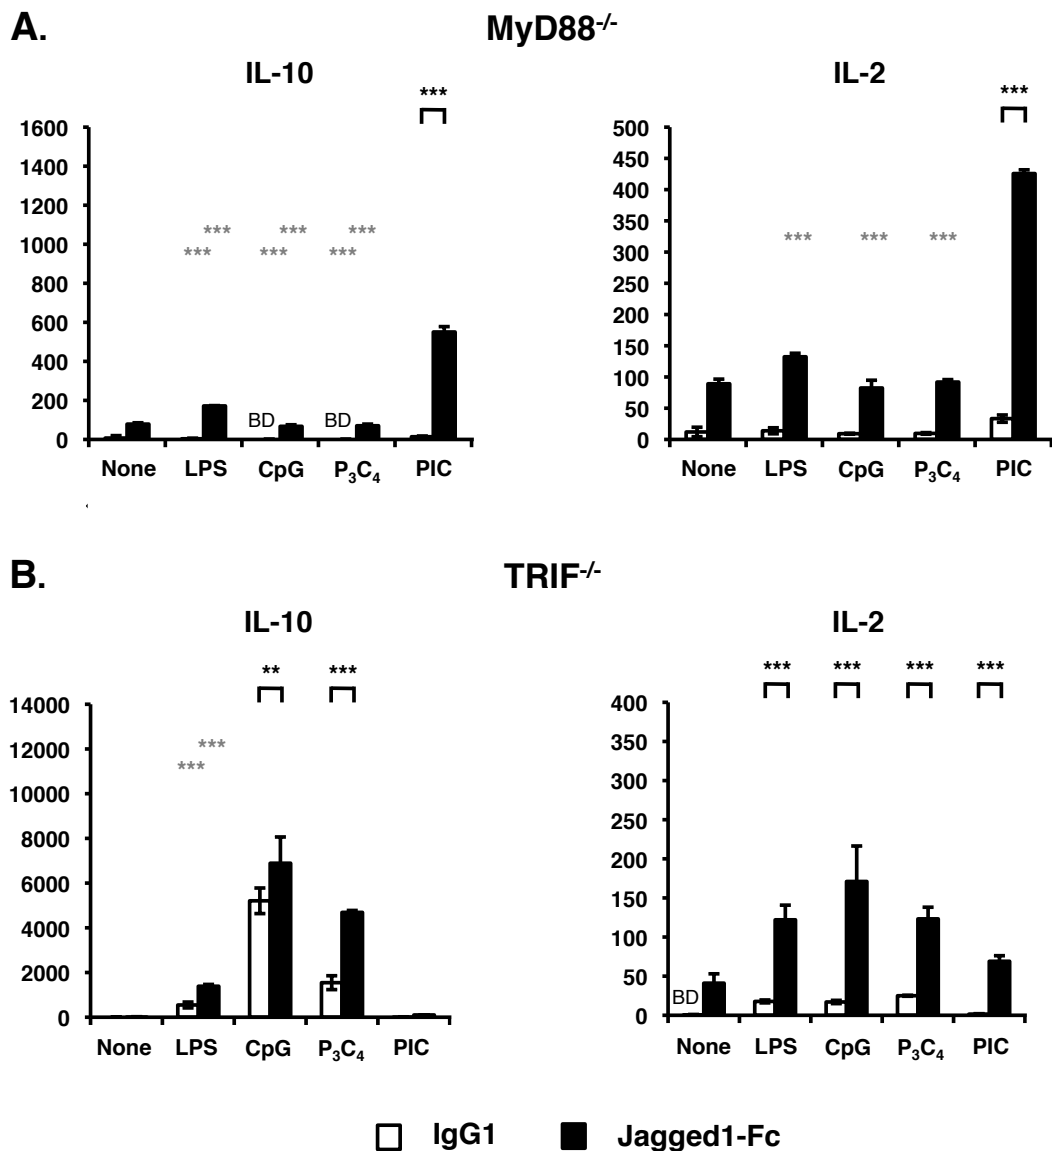

**Supplementary Figure S4 MyD88 is required for Notch modulation of CpG and Pam<sub>3</sub>CSK<sub>4</sub> induced cytokines while TRIF is required for Notch modulation of Poly [I:C] induced cytokine expression. BMDC from MyD88<sup>-/-</sup> (A) or TRIF<sup>-/-</sup> (B)**

mice were stimulated with plate bound IgG1 or Jagged1-Fc in the absence (none) or presence of 100 ng/ml LPS, 0.5  $\mu$ g/ml CpG, 1  $\mu$ g/ml Pam<sub>3</sub>CSK<sub>4</sub> (P<sub>3</sub>C<sub>4</sub>) or 100  $\mu$ g/ml Poly [I:C] (PIC) for 24 hours. Accumulation of IL-10, and IL-2 protein in the supernatant was measured by ELISA. Data shown are mean  $\pm$  standard deviation of cell culture triplicates from a representative example of data obtained from two mice per genotype. Two-way ANOVA with Bonferroni post-test was used to judge whether observed differences were statistically significant; P<0.05 was considered significant. Black stars indicate a statistically significant difference between cells stimulated with IgG1 and Jagged1-Fc. Grey stars indicate a statistically significant difference between wild-type and MyD88<sup>-/-</sup> or wild-type and TRIF<sup>-/-</sup> respectively. Absence of stars indicates that the difference is not significant. \* = P<0.05, \*\* = P<0.01, \*\*\* = P<0.001. BD = below the detection limit of the assay.
